# Supplementary material for: The Impact of Item Parceling Ratios and Strategies on the Internal Structure of Assessment Center Ratings
Source: Atypon-hosted journal article supplement (doi:10.1027/1866-5888/a000266), 2021-01-01
Supplement: 1866-5888_a000266_esm1.pdf [file 1866-5888_a000266_esm1.pdf]

**Electronic Supplementary Material for  
 Buckett, A., Becker, J. R., & Roodt, G. (2020). The impact of item parceling ratios and strategies on the internal structure of  
 assessment center ratings. A study using confirmatory factor analysis. *Journal of Personnel Psychology*.  
<https://doi.org/10.1027/1866-5888/a000266>**

**Table E1.** Model–data fit indices for confirmatory factor analyses models for Sample 1

| Model                                                      | Model<br>termination | Admissibility | $\chi^2$ | <i>df</i> | <i>p</i> value | SRMR | RMSEA | TLI  | CFI  |
|------------------------------------------------------------|----------------------|---------------|----------|-----------|----------------|------|-------|------|------|
| <i>Model 1: Correlated Dimensions-Correlated Exercises</i> |                      |               |          |           |                |      |       |      |      |
| Baseline model                                             |                      |               |          |           |                |      |       |      |      |
| 1 Parcel                                                   | Yes                  | No            | 12.99    | 12        | 0.37           | 0.02 | 0.02  | 1.00 | 1.00 |
| Parceling strategy: Random                                 |                      |               |          |           |                |      |       |      |      |
| 2 Parcel                                                   | Yes                  | Yes           | 282.46   | 111       | 0              | 0.07 | 0.08  | 0.94 | 0.95 |
| 3 Parcel                                                   | Yes                  | Yes           | 612.76   | 291       | 0              | 0.06 | 0.07  | 0.92 | 0.94 |
| Parceling strategy: Factorial                              |                      |               |          |           |                |      |       |      |      |
| 2 Parcel                                                   | Yes                  | No            | 209.73   | 111       | 0              | 0.06 | 0.06  | 0.96 | 0.97 |
| 3 Parcel                                                   | Yes                  | Yes           | 889.97   | 292       | 0              | 0.54 | 0.09  | 0.85 | 0.88 |
| Parceling strategy: Correlational                          |                      |               |          |           |                |      |       |      |      |
| 2 Parcel                                                   | Yes                  | Yes           | 224.65   | 111       | 0              | 0.05 | 0.07  | 0.95 | 0.96 |
| 3 Parcel                                                   | Yes                  | Yes           | 711.38   | 291       | 0              | 0.06 | 0.08  | 0.88 | 0.90 |
| <i>Model 2: Correlated Dimensions</i>                      |                      |               |          |           |                |      |       |      |      |
| Baseline model                                             |                      |               |          |           |                |      |       |      |      |
| 1 Parcel                                                   | Yes                  | Yes           | 652.23   | 24        | 0              | 0.17 | 0.33  | 0.39 | 0.60 |
| Parceling strategy: Random                                 |                      |               |          |           |                |      |       |      |      |
| 2 Parcel                                                   | Yes                  | Yes           | 1765.17  | 132       | 0              | 0.20 | 0.23  | 0.48 | 0.55 |
| 3 Parcel                                                   | Yes                  | Yes           | 2773.64  | 321       | 0              | 0.19 | 0.18  | 0.47 | 0.52 |

## Item Parceling Ratios and Strategies for Assessment Center Research – ESM 1

| Model                                                              | Model termination | Admissibility | $\chi^2$ | <i>df</i> | <i>p</i> value | SRMR | RMSEA | TLI  | CFI  |
|--------------------------------------------------------------------|-------------------|---------------|----------|-----------|----------------|------|-------|------|------|
| Parceling strategy: Factorial                                      |                   |               |          |           |                |      |       |      |      |
| 2 Parcel                                                           | Yes               | Yes           | 1812.27  | 132       | 0              | 0.20 | 0.23  | 0.45 | 0.53 |
| 3 Parcel                                                           | Yes               | Yes           | 2911.16  | 322       | 0              | 0.54 | 0.18  | 0.42 | 0.46 |
| Parceling strategy: Correlational                                  |                   |               |          |           |                |      |       |      |      |
| 2 Parcel                                                           | Yes               | Yes           | 1548.99  | 132       | 0              | 0.19 | 0.21  | 0.48 | 0.55 |
| 3 Parcel                                                           | Yes               | Yes           | 2470.00  | 321       | 0              | 0.17 | 0.17  | 0.45 | 0.50 |
| <i>Model 3: Correlated Exercises</i>                               |                   |               |          |           |                |      |       |      |      |
| Baseline model                                                     |                   |               |          |           |                |      |       |      |      |
| 1 Parcel                                                           | Yes               | Yes           | 42.64    | 24        | 0.01           | 0.04 | 0.06  | 0.98 | 0.99 |
| Parceling strategy: Random                                         |                   |               |          |           |                |      |       |      |      |
| 2 Parcel                                                           | Yes               | Yes           | 479.03   | 132       | 0              | 0.07 | 0.10  | 0.89 | 0.91 |
| 3 Parcel                                                           | Yes               | Yes           | 907.28   | 321       | 0              | 0.06 | 0.09  | 0.87 | 0.89 |
| Parceling strategy: Factorial                                      |                   |               |          |           |                |      |       |      |      |
| 2 Parcel                                                           | Yes               | Yes           | 421.89   | 132       | 0              | 0.06 | 0.10  | 0.91 | 0.92 |
| 3 Parcel                                                           | Yes               | Yes           | 856.75   | 321       | 0              | 0.06 | 0.08  | 0.88 | 0.89 |
| Parceling strategy: Correlational                                  |                   |               |          |           |                |      |       |      |      |
| 2 Parcel                                                           | Yes               | Yes           | 406.14   | 132       | 0              | 0.06 | 0.09  | 0.90 | 0.91 |
| 3 Parcel                                                           | Yes               | Yes           | 953.34   | 321       | 0              | 0.06 | 0.09  | 0.84 | 0.85 |
| <i>Model 4: Correlated Dimensions + General Performance Factor</i> |                   |               |          |           |                |      |       |      |      |
| Baseline model                                                     |                   |               |          |           |                |      |       |      |      |
| 1 Parcel                                                           | Yes               | Yes           | 190.18   | 15        | 0              | 0.10 | 0.22  | 0.73 | 0.89 |
| Parceling strategy: Random                                         |                   |               |          |           |                |      |       |      |      |
| 2 Parcel                                                           | Yes               | Yes           | 880.45   | 114       | 0              | 0.13 | 0.17  | 0.72 | 0.79 |
| 3 Parcel                                                           | Yes               | Yes           | 1452.64  | 294       | 0              | 0.12 | 0.13  | 0.73 | 0.77 |
| Parceling strategy: Factorial                                      |                   |               |          |           |                |      |       |      |      |
| 2 Parcel                                                           | Yes               | Yes           | 1160.98  | 114       | 0              | 0.15 | 0.19  | 0.61 | 0.71 |
| 3 Parcel                                                           | Yes               | Yes           | 1609.92  | 295       | 0              | 0.51 | 0.14  | 0.68 | 0.73 |

## Item Parceling Ratios and Strategies for Assessment Center Research – ESM 1

| Model                                                             | Model termination | Admissibility | $\chi^2$ | $df$ | $p$ value | SRMR | RMSEA | TLI  | CFI  |
|-------------------------------------------------------------------|-------------------|---------------|----------|------|-----------|------|-------|------|------|
| Parceling strategy: Correlational                                 |                   |               |          |      |           |      |       |      |      |
| 2 Parcel                                                          | Yes               | Yes           | 755.59   | 114  | 0         | 0.12 | 0.15  | 0.73 | 0.80 |
| 3 Parcel                                                          | Yes               | Yes           | 1405.58  | 294  | 0         | 0.11 | 0.12  | 0.69 | 0.74 |
| <i>Model 5: Correlated Exercises + General Performance Factor</i> |                   |               |          |      |           |      |       |      |      |
| Baseline model                                                    |                   |               |          |      |           |      |       |      |      |
| 1 Parcel                                                          | Yes               | Yes           | 19.26    | 15   | 0.2       | 0.02 | 0.03  | 0.99 | 1.00 |
| Parceling strategy: Random                                        |                   |               |          |      |           |      |       |      |      |
| 2 Parcel                                                          | Yes               | Yes           | 362.47   | 114  | 0         | 0.05 | 0.10  | 0.91 | 0.93 |
| 3 Parcel                                                          | Yes               | Yes           | 760.57   | 294  | 0         | 0.05 | 0.08  | 0.89 | 0.91 |
| Parceling strategy: Factorial                                     |                   |               |          |      |           |      |       |      |      |
| 2 Parcel                                                          | Yes               | Yes           | 306.58   | 114  | 0         | 0.05 | 0.08  | 0.93 | 0.95 |
| 3 Parcel                                                          | Yes               | Yes           | 744.00   | 294  | 0         | 0.05 | 0.08  | 0.89 | 0.91 |
| Parceling strategy: Correlational                                 |                   |               |          |      |           |      |       |      |      |
| 2 Parcel                                                          | Yes               | Yes           | 267.53   | 114  | 0         | 0.04 | 0.07  | 0.93 | 0.95 |
| 3 Parcel                                                          | Yes               | Yes           | 820.74   | 294  | 0         | 0.06 | 0.09  | 0.85 | 0.88 |

*Note.* Model termination = converged to a solution; admissibility = no out-of-bounds estimates;  $df$  = model degrees of freedom;  $\chi^2$  = chi-square test of independence; SRMR = standardized root squared mean residual; RMSEA = root mean squared error of approximation; TLI = Tucker-Lewis index; CFI = comparative fit index.

**Table E2.** Model–data fit indices for confirmatory factor analyses models for Sample 2

| Model                                                      | Model Termination | Admissibility | $\chi^2$ | <i>df</i> | <i>p</i> value | SRMR | RMSEA | TLI  | CFI  |
|------------------------------------------------------------|-------------------|---------------|----------|-----------|----------------|------|-------|------|------|
| <i>Model 1: Correlated Dimensions-Correlated Exercises</i> |                   |               |          |           |                |      |       |      |      |
| Baseline model                                             |                   |               |          |           |                |      |       |      |      |
| 1 Parcel                                                   | No                | No            |          |           |                |      |       |      |      |
| Parceling strategy: Random                                 |                   |               |          |           |                |      |       |      |      |
| 2 Parcel                                                   | Yes               | Yes           | 60.16    | 38        | 0.01           | 0.02 | 0.04  | 0.98 | 0.99 |
| 3 Parcel                                                   | Yes               | Yes           | 193.23   | 113       | 0              | 0.03 | 0.05  | 0.96 | 0.97 |
| Parceling strategy: Factorial                              |                   |               |          |           |                |      |       |      |      |
| 2 Parcel                                                   | Yes               | Yes           | 74.93    | 38        | 0              | 0.02 | 0.06  | 0.97 | 0.98 |
| 3 Parcel                                                   | Yes               | Yes           | 32.17    | 38        | 0.74           | 0.02 | 0.00  | 1.01 | 1.00 |
| Parceling strategy: Correlational                          |                   |               |          |           |                |      |       |      |      |
| 2 Parcel                                                   | Yes               | Yes           | 52.84    | 38        | 0.06           | 0.02 | 0.04  | 0.99 | 0.99 |
| 3 Parcel                                                   | No                | No            |          |           |                |      |       |      |      |
| <i>Model 2: Correlated Dimensions</i>                      |                   |               |          |           |                |      |       |      |      |
| Baseline model                                             |                   |               |          |           |                |      |       |      |      |
| 1 Parcel                                                   | Yes               | Yes           | 154.28   | 6         | 0              | 0.08 | 0.29  | 0.58 | 0.83 |
| Parceling strategy: Random                                 |                   |               |          |           |                |      |       |      |      |
| 2 Parcel                                                   | Yes               | Yes           | 629.45   | 51        | 0              | 0.13 | 0.19  | 0.64 | 0.72 |
| 3 Parcel                                                   | Yes               | Yes           | 983.70   | 132       | 0              | 0.11 | 0.15  | 0.66 | 0.71 |
| Parceling strategy: Factorial                              |                   |               |          |           |                |      |       |      |      |
| 2 Parcel                                                   | Yes               | Yes           | 604.60   | 51        | 0              | 0.10 | 0.19  | 0.65 | 0.73 |
| 3 Parcel                                                   | Yes               | Yes           | 356.78   | 51        | 0              | 0.09 | 0.14  | 0.76 | 0.81 |
| Parceling strategy: Correlational                          |                   |               |          |           |                |      |       |      |      |
| 2 Parcel                                                   | Yes               | Yes           | 751.99   | 51        | 0              | 0.12 | 0.21  | 0.57 | 0.66 |
| 3 Parcel                                                   | Yes               | Yes           | 593.19   | 51        | 0              | 0.15 | 0.18  | 0.64 | 0.72 |

## Item Parceling Ratios and Strategies for Assessment Center Research – ESM 1

| Model                                                             | Model Termination | Admissibility | $\chi^2$ | <i>df</i> | <i>p</i> value | SRMR | RMSEA | TLI  | CFI  |
|-------------------------------------------------------------------|-------------------|---------------|----------|-----------|----------------|------|-------|------|------|
| <i>Model 3: Correlated Exercises</i>                              |                   |               |          |           |                |      |       |      |      |
| Baseline model                                                    |                   |               |          |           |                |      |       |      |      |
| 1 Parcel                                                          | Yes               | Yes           | 49.63    | 8         | 0              | 0.04 | 0.13  | 0.91 | 0.95 |
| Parceling strategy: Random                                        |                   |               |          |           |                |      |       |      |      |
| 2 Parcel                                                          | Yes               | Yes           | 319.25   | 53        | 0              | 0.09 | 0.13  | 0.84 | 0.87 |
| 3 Parcel                                                          | Yes               | Yes           | 488.58   | 134       | 0              | 0.08 | 0.09  | 0.86 | 0.88 |
| Parceling strategy: Factorial                                     |                   |               |          |           |                |      |       |      |      |
| 2 Parcel                                                          | Yes               | Yes           | 299.73   | 53        | 0              | 0.08 | 0.12  | 0.85 | 0.88 |
| 3 Parcel                                                          | Yes               | Yes           | 210.74   | 53        | 0              | 0.07 | 0.10  | 0.88 | 0.90 |
| Parceling strategy: Correlational                                 |                   |               |          |           |                |      |       |      |      |
| 2 Parcel                                                          | Yes               | Yes           | 364.28   | 53        | 0              | 0.11 | 0.14  | 0.81 | 0.85 |
| 3 Parcel                                                          | Yes               | Yes           | 378.15   | 53        | 0              | 0.13 | 0.14  | 0.79 | 0.83 |
| <i>Model 4: Correlated Dimensions + GPF</i>                       |                   |               |          |           |                |      |       |      |      |
| Baseline model                                                    |                   |               |          |           |                |      |       |      |      |
| 1 Parcel                                                          | Yes               | No            | 0.01     | 0         | 0              | 0.00 | 0.00  | 1.00 | 1.00 |
| Parceling strategy: Random                                        |                   |               |          |           |                |      |       |      |      |
| 2 Parcel                                                          | Yes               | Yes           | 61.05    | 39        | 0              | 0.02 | 0.04  | 0.98 | 0.99 |
| 3 Parcel                                                          | Yes               | Yes           | 189.39   | 114       | 0              | 0.03 | 0.05  | 0.97 | 0.97 |
| Parceling strategy: Factorial                                     |                   |               |          |           |                |      |       |      |      |
| 2 Parcel                                                          | Yes               | Yes           | 75.07    | 39        | 0              | 0.02 | 0.06  | 0.97 | 0.98 |
| 3 Parcel                                                          | Yes               | Yes           | 41.32    | 39        | 0.37           | 0.02 | 0.01  | 1.00 | 0.99 |
| Parceling strategy: Correlational                                 |                   |               |          |           |                |      |       |      |      |
| 2 Parcel                                                          | Yes               | Yes           | 55.42    | 39        | 0.04           | 0.02 | 0.04  | 0.99 | 0.99 |
| 3 Parcel                                                          | No                | No            |          |           |                |      |       |      |      |
| <i>Model 5: Correlated Exercises + General Performance Factor</i> |                   |               |          |           |                |      |       |      |      |
| Baseline model                                                    |                   |               |          |           |                |      |       |      |      |
| 1 Parcel                                                          | Yes               | Yes           | 495.35   | 149       | 0              | 0.06 | 0.09  | 0.90 | 0.92 |

## Item Parceling Ratios and Strategies for Assessment Center Research – ESM 1

| Model                             | Model Termination | Admissibility | $\chi^2$ | $df$ | $p$ value | SRMR | RMSEA | TLI  | CFI  |
|-----------------------------------|-------------------|---------------|----------|------|-----------|------|-------|------|------|
| Parceling strategy: Random        |                   |               |          |      |           |      |       |      |      |
| 2 Parcel                          | Yes               | Yes           | 121.38   | 41   | 0         | 0.05 | 0.08  | 0.94 | 0.96 |
| 3 Parcel                          | Yes               | Yes           | 346.20   | 116  | 0         | 0.06 | 0.08  | 0.90 | 0.92 |
| Parceling strategy: Factorial     |                   |               |          |      |           |      |       |      |      |
| 2 Parcel                          | Yes               | Yes           | 173.63   | 41   | 0         | 0.05 | 0.10  | 0.90 | 0.94 |
| 3 Parcel                          | Yes               | Yes           | 63.13    | 41   | 0.01      | 0.03 | 0.04  | 0.98 | 0.99 |
| Parceling strategy: Correlational |                   |               |          |      |           |      |       |      |      |
| 2 Parcel                          | Yes               | Yes           | 121.42   | 41   | 0         | 0.03 | 0.08  | 0.94 | 0.96 |
| 3 Parcel                          | Yes               | Yes           | 126.28   | 41   | 0         | 0.03 | 0.08  | 0.93 | 0.96 |

*Note.* Model termination = converged to a solution; admissibility = no out-of-bounds estimates;  $df$  = model degrees of freedom;  $\chi^2$  = chi-square test of independence; SRMR = standardized root squared mean residual; RMSEA = root mean squared error of approximation; TLI = Tucker-Lewis index; CFI = comparative fit index.

**Table E3.** Summary of model parameters across models for Sample 1

| Model                                                      | Lowest Estimate | Highest Estimate | Number of out-of-bounds Estimates | Average Factor Loading |
|------------------------------------------------------------|-----------------|------------------|-----------------------------------|------------------------|
| <i>Model 1: Correlated Dimensions-Correlated Exercises</i> |                 |                  |                                   |                        |
| Baseline model                                             |                 |                  |                                   |                        |
| 1 Parcel                                                   | 0.22            | 0.89             | 1                                 | 0.58                   |
| Parceling strategy: Random                                 |                 |                  |                                   |                        |
| 2 Parcel                                                   | 0.01            | 0.94             | 0                                 | 0.60                   |
| 3 Parcel                                                   | 0.00            | 0.93             | 0                                 | 0.54                   |
| Parceling strategy: Factorial                              |                 |                  |                                   |                        |
| 2 Parcel                                                   | 0.01            | 0.94             | 1                                 | 0.57                   |
| 3 Parcel                                                   | 0.01            | 0.91             | 0                                 | 0.59                   |
| Parceling strategy: Correlational                          |                 |                  |                                   |                        |
| 2 Parcel                                                   | 0.01            | 0.93             | 0                                 | 0.58                   |
| 3 Parcel                                                   | 0.01            | 0.92             | 0                                 | 0.47                   |
| <i>Model 2: Correlated Dimensions</i>                      |                 |                  |                                   |                        |
| Baseline model                                             |                 |                  |                                   |                        |
| 1 Parcel                                                   | 0.19            | 0.85             | 0                                 | 0.48                   |
| Parceling strategy: Random                                 |                 |                  |                                   |                        |
| 2 Parcel                                                   | 0.12            | 0.95             | 0                                 | 0.49                   |
| 3 Parcel                                                   | 0.16            | 0.94             | 0                                 | 0.48                   |
| Parceling strategy: Factorial                              |                 |                  |                                   |                        |
| 2 Parcel                                                   | 0.16            | 0.94             | 0                                 | 0.49                   |
| 3 Parcel                                                   | 0.18            | 0.97             | 0                                 | 0.63                   |
| Parceling strategy: Correlational                          |                 |                  |                                   |                        |
| 2 Parcel                                                   | 0.17            | 0.91             | 0                                 | 0.48                   |
| 3 Parcel                                                   | 0.16            | 0.89             | 0                                 | 0.46                   |
| <i>Model 3: Correlated Exercises</i>                       |                 |                  |                                   |                        |
| Baseline model                                             |                 |                  |                                   |                        |
| 1 Parcel                                                   | 0.50            | 0.96             | 0                                 | 0.83                   |
| Parceling strategy: Random                                 |                 |                  |                                   |                        |
| 2 Parcel                                                   | 0.46            | 0.94             | 0                                 | 0.79                   |
| 3 Parcel                                                   | 0.47            | 0.93             | 0                                 | 0.76                   |
| Parceling strategy: Factorial                              |                 |                  |                                   |                        |
| 2 Parcel                                                   | 0.53            | 0.94             | 0                                 | 0.80                   |
| 3 Parcel                                                   | 0.51            | 0.91             | 0                                 | 0.75                   |
| Parceling strategy: Correlational                          |                 |                  |                                   |                        |
| 2 Parcel                                                   | 0.47            | 0.93             | 0                                 | 0.77                   |
| 3 Parcel                                                   | 0.50            | 0.92             | 0                                 | 0.72                   |

## Item Parceling Ratios and Strategies for Assessment Center Research – ESM 1

| Model                                                  | Lowest Estimate | Highest Estimate | Number of out-of-bounds Estimates | Average Factor Loading |
|--------------------------------------------------------|-----------------|------------------|-----------------------------------|------------------------|
| <i>Model 4: Correlated Dimensions + General Factor</i> |                 |                  |                                   |                        |
| Baseline model                                         |                 |                  |                                   |                        |
| 1 Parcel                                               | 0.02            | 0.99             | 0                                 | 0.45                   |
| Parceling strategy: Random                             |                 |                  |                                   |                        |
| 2 Parcel                                               | 0.03            | 0.93             | 0                                 | 0.48                   |
| 3 Parcel                                               | 0.02            | 0.93             | 0                                 | 0.45                   |
| Parceling strategy: Factorial                          |                 |                  |                                   |                        |
| 2 Parcel                                               | 0.01            | 0.94             | 0                                 | 0.43                   |
| 3 Parcel                                               | 0.02            | 0.95             | 0                                 | 0.42                   |
| Parceling strategy: Correlational                      |                 |                  |                                   |                        |
| 2 Parcel                                               | 0.02            | 0.93             | 0                                 | 0.43                   |
| 3 Parcel                                               | 0.04            | 0.91             | 0                                 | 0.44                   |
| <i>Model 5: Correlated Exercises + General Factor</i>  |                 |                  |                                   |                        |
| Baseline model                                         |                 |                  |                                   |                        |
| 1 Parcel                                               | 0.19            | 0.89             | 0                                 | 0.57                   |
| Parceling strategy: Random                             |                 |                  |                                   |                        |
| 2 Parcel                                               | 0.09            | 0.88             | 0                                 | 0.54                   |
| 3 Parcel                                               | 0.03            | 0.89             | 0                                 | 0.49                   |
| Parceling strategy: Factorial                          |                 |                  |                                   |                        |
| 2 Parcel                                               | 0.12            | 0.88             | 0                                 | 0.54                   |
| 3 Parcel                                               | 0.03            | 0.89             | 0                                 | 0.49                   |
| Parceling strategy: Correlational                      |                 |                  |                                   |                        |
| 2 Parcel                                               | 0.10            | 0.90             | 0                                 | 0.69                   |
| 3 Parcel                                               | 0.02            | 0.93             | 0                                 | 0.47                   |

*Note.* The number of out-of-bounds estimates refers to any variances and residual variances that are negative.



**Table E4.** Summary of model parameters across models for Sample 2

| Model                                                      | Lowest Estimate | Highest Estimate | Number of out-of-bounds Estimates | Average Factor Loading |
|------------------------------------------------------------|-----------------|------------------|-----------------------------------|------------------------|
| <i>Model 1: Correlated Dimensions-Correlated Exercises</i> |                 |                  |                                   |                        |
| Baseline model                                             |                 |                  |                                   |                        |
| 1 Parcel                                                   |                 |                  |                                   |                        |
| Parceling strategy: Random                                 |                 |                  |                                   |                        |
| 2 Parcel                                                   | 0.00            | 0.92             | 0                                 | 0.59                   |
| 3 Parcel                                                   | 0.03            | 0.86             | 0                                 | 0.52                   |
| Parceling strategy: Factorial                              |                 |                  |                                   |                        |
| 2 Parcel                                                   | 0.08            | 0.84             | 0                                 | 0.54                   |
| 3 Parcel                                                   | 0.01            | 0.87             | 0                                 | 0.51                   |
| Parceling strategy: Correlational                          |                 |                  |                                   |                        |
| 2 Parcel                                                   | 0.02            | 0.88             | 0                                 | 0.59                   |
| 3 Parcel                                                   |                 |                  |                                   |                        |
| <i>Model 2: Correlated Dimensions</i>                      |                 |                  |                                   |                        |
| Baseline model                                             |                 |                  |                                   |                        |
| 1 Parcel                                                   |                 |                  |                                   |                        |
| 2 Parcel                                                   | 0.65            | 0.78             | 0                                 | 0.71                   |
| Parceling strategy: Random                                 |                 |                  |                                   |                        |
| 2 Parcel                                                   | 0.52            | 0.90             | 0                                 | 0.70                   |
| 3 Parcel                                                   | 0.52            | 0.83             | 0                                 | 0.67                   |
| Parceling strategy: Factorial                              |                 |                  |                                   |                        |
| 2 Parcel                                                   | 0.61            | 0.82             | 0                                 | 0.72                   |
| 3 Parcel                                                   | 0.49            | 0.85             | 0                                 | 0.71                   |
| Parceling strategy: Correlational                          |                 |                  |                                   |                        |
| 2 Parcel                                                   | 0.57            | 0.81             | 0                                 | 0.68                   |
| 3 Parcel                                                   | 0.47            | 0.85             | 0                                 | 0.68                   |
| <i>Model 3: Correlated Exercises</i>                       |                 |                  |                                   |                        |
| Baseline model                                             |                 |                  |                                   |                        |
| 1 Parcel                                                   |                 |                  |                                   |                        |
| 2 Parcel                                                   | 0.79            | 0.88             | 0                                 | 0.83                   |
| Parceling strategy: Random                                 |                 |                  |                                   |                        |
| 2 Parcel                                                   | 0.49            | 0.89             | 0                                 | 0.77                   |
| 3 Parcel                                                   | 0.56            | 0.84             | 0                                 | 0.72                   |
| Parceling strategy: Factorial                              |                 |                  |                                   |                        |
| 2 Parcel                                                   | 0.63            | 0.86             | 0                                 | 0.77                   |
| 3 Parcel                                                   | 0.53            | 0.82             | 0                                 | 0.75                   |
| Parceling strategy: Correlational                          |                 |                  |                                   |                        |
| 2 Parcel                                                   | 0.48            | 0.85             | 0                                 | 0.74                   |
| 3 Parcel                                                   | 0.45            | 0.83             | 0                                 | 0.72                   |
| <i>Model 4: Correlated Dimensions + General Factor</i>     |                 |                  |                                   |                        |
| Baseline model                                             |                 |                  |                                   |                        |
| 1 Parcel                                                   |                 |                  |                                   |                        |
| 2 Parcel                                                   | 0.09            | 0.91             | 2                                 | 0.53                   |
| 2 Parcel                                                   | 0.02            | 0.91             | 0                                 | 0.53                   |
| 3 Parcel                                                   | 0.04            | 0.85             | 0                                 | 0.52                   |

## Item Parceling Ratios and Strategies for Assessment Center Research – ESM 1

| Model                                                 | Lowest Estimate | Highest Estimate | Number of out-of-bounds Estimates | Average Factor Loading |
|-------------------------------------------------------|-----------------|------------------|-----------------------------------|------------------------|
| Parceling strategy: Factorial                         |                 |                  |                                   |                        |
| 2 Parcel                                              | 0.04            | 0.81             | 0                                 | 0.60                   |
| 3 Parcel                                              | 0.03            | 0.84             | 0                                 | 0.53                   |
| Parceling strategy: Correlational                     |                 |                  |                                   |                        |
| 2 Parcel                                              | 0.20            | 0.87             | 0                                 | 0.61                   |
| 3 Parcel                                              |                 |                  |                                   |                        |
| <i>Model 5: Correlated Exercises + General Factor</i> |                 |                  |                                   |                        |
| Baseline model                                        |                 |                  |                                   |                        |
| 1 Parcel                                              | 0.36            | 0.88             | 0                                 | 0.64                   |
| Parceling strategy: Random                            |                 |                  |                                   |                        |
| 2 Parcel                                              | 0.16            | 0.84             | 0                                 | 0.55                   |
| 3 Parcel                                              | 0.06            | 0.86             | 0                                 | 0.49                   |
| Parceling strategy: Factorial                         |                 |                  |                                   |                        |
| 2 Parcel                                              | 0.04            | 0.79             | 0                                 | 0.54                   |
| 3 Parcel                                              | 0.16            | 0.83             | 0                                 | 0.52                   |
| Parceling strategy: Correlational                     |                 |                  |                                   |                        |
| 2 Parcel                                              | 0.05            | 0.86             | 0                                 | 0.53                   |
| 3 Parcel                                              | 0.04            | 0.82             | 0                                 | 0.57                   |

*Note.* The number of out-of-bounds estimates refers to any variances and residual variances that are negative.
